# Supplementary material for: Xanthine Oxidase Inhibitory Activity, Chemical Composition, Antioxidant Properties and GC-MS Analysis of Keladi Candik (Alocasia longiloba Miq)
Source: PubMed Central journal article supplement (PMC7321287; doi:10.3390/molecules25112658), 2020-06-08
Supplement: molecules-25-02658-s001.pdf [file molecules-25-02658-s001.pdf]

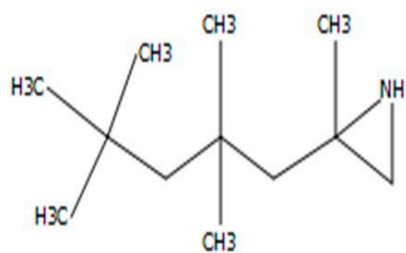

Aziridine, 2-methyl-2-(2,2,4,4-tetramethylpentyl)-

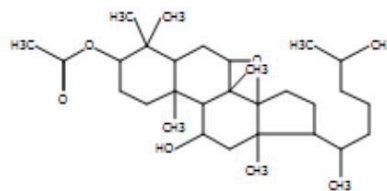

7,8-Epoxy lanostan-11-ol, 3-acetoxy-
